# Supplementary material
Source: PubMed Central journal article supplement (PMC10808366)
Supplement: 404_2023_6949_MOESM1_ESM.pdf [file 404_2023_6949_MOESM1_ESM.pdf]

# **Oral glucose tolerance test and continuous glucose monitoring for gestational diabetes diagnosis: a survey study of women and health care professionals.**

*Daria Di Filippo (RM, MBBS)<sup>1</sup>, Justine Darling (DE, CNS)<sup>2</sup>, Melissa Han Yiin Chang (PHD)<sup>1</sup>, Amanda Henry (PHD)<sup>1,3</sup>, Alec Welsh (PHD)<sup>1,4</sup>*

<sup>1</sup> School of Women's and Children's Health  
University of New South Wales  
Sydney, NSW  
Australia

<sup>2</sup> Diabetes Clinic  
Royal Hospital for Women  
Sydney, NSW  
Australia

<sup>3</sup> Department of Women's and Children's Health  
St George Hospital  
Sydney, NSW  
Australia

<sup>6</sup> Department of Maternal-Fetal Medicine  
Royal Hospital for Women  
Sydney, NSW  
Australia

Corresponding author: Professor A W Welsh  
Department of Maternal-Fetal Medicine  
Royal Hospital for Women  
Locked Bag 2000, Barker Street  
Randwick, NSW 2031  
Australia  
Tel: (+61) 293825272  
Fax: (+61) 293826444  
Email: [alec.welsh@unsw.edu.au](mailto:alec.welsh@unsw.edu.au)

# Supplementary material 1. CGM and OGTT acceptability questionnaire for women

## CGM acceptability questionnaire -

Please fill this questionnaire to help us understand how pregnant women find CGM.

\*Required

1. Email \*

---

2. Name and Surname \*

---

3. Phone number \*

---

4. Did you find the device generally acceptable (tolerable)? \*

Mark only one oval.

1 2 3 4 5

---

I found CGM overall very unacceptable      I found CGM overall very acceptable

---

5. Could you please rate on the following scale the acceptability of the insertion of the device: \*

Mark only one oval.

1 2 3 4 5

---

Insertion was very unacceptable      Insertion was very acceptable

---

6. Could you please rate on the following scale the acceptability of wearing the device: \*

Mark only one oval.

1 2 3 4 5

---

The device was difficult to wear or caused significant problems      The device was easy to wear and caused no problems

---

7. Could you please rate on the following scale the acceptability of removal of the device: \*

Mark only one oval.

1 2 3 4 5

---

Removal of the device was very unacceptable      Removal of the device was very acceptable

---

8. Would you recommend this form of testing for gestational diabetes to other pregnant women? \*

Mark only one oval.

1    2    3    4    5

---

I would not recommend      I would recommend this form of testing to other pregnant women

---

9. Please provide any further comments in the space below:

---

---

---

---

---

---

This content is neither created nor endorsed by Google.

Google Forms

# OGTT acceptability questionnaire -

Please fill this questionnaire to help us understand how pregnant women find OGTT.

\*Required

1. Email \*

---

2. Name and Surname \*

---

3. Phone number \*

---

4. Did you find the OGTT generally acceptable (tolerable)? \*

Mark only one oval.

1 2 3 4 5

I found the OGTT overall very unacceptable      I found the OGTT overall very acceptable

5. Could you please rate on the following scale the acceptability of having to fast to undergo the test: \*

Mark only one oval.

1 2 3 4 5

Fasting was very unacceptable      Fasting was very acceptable

6. Could you please rate on the following scale the acceptability of the glucose beverage: \*

Mark only one oval.

1 2 3 4 5

The glucose beverage was very unacceptable      The glucose beverage was very acceptable

7. Could you please rate on the following scale the acceptability of blood collection: \*

Mark only one oval.

1 2 3 4 5

Blood collection was annoying or caused significant problems      Blood collection was not annoying and caused no p

8. Could you please rate on the following scale the acceptability of the time frame of the test, including the 2 hours waiting period: \*

Mark only one oval.

1      2      3      4      5

---

The time frame was very unacceptable      The time frame was very acceptable

9. Would you recommend this form of testing for gestational diabetes to other pregnant women? \*

Mark only one oval.

1      2      3      4      5

---

I would not recommend it      I would recommend this form of testing to other pregnant women

10. Please provide any further comments in the space below:

---

---

---

---

---

---

This content is neither created nor endorsed by Google.

Google Forms
