# Supplementary material
Source: PubMed Central journal article supplement (PMC10808366)
Supplement: 404_2023_6949_MOESM4_ESM.pdf [file 404_2023_6949_MOESM4_ESM.pdf]

# **Oral glucose tolerance test and continuous glucose monitoring for gestational diabetes diagnosis: a survey study of women and health care professionals.**

*Daria Di Filippo (RM, MBBS)<sup>1</sup>, Justine Darling (DE, CNS)<sup>2</sup>, Melissa Han Yiin Chang (PHD)<sup>1</sup>, Amanda Henry (PHD)<sup>1,3</sup>, Alec Welsh (PHD)<sup>1,4</sup>*

<sup>1</sup> School of Women's and Children's Health  
University of New South Wales  
Sydney, NSW  
Australia

<sup>2</sup> Diabetes Clinic  
Royal Hospital for Women  
Sydney, NSW  
Australia

<sup>3</sup> Department of Women's and Children's Health  
St George Hospital  
Sydney, NSW  
Australia

<sup>6</sup> Department of Maternal-Fetal Medicine  
Royal Hospital for Women  
Sydney, NSW  
Australia

Corresponding author: Professor A W Welsh  
Department of Maternal-Fetal Medicine  
Royal Hospital for Women  
Locked Bag 2000, Barker Street  
Randwick, NSW 2031  
Australia  
Tel: (+61) 293825272  
Fax: (+61) 293826444  
Email: [alec.welsh@unsw.edu.au](mailto:alec.welsh@unsw.edu.au)

### Supplementary material 3. Women's free comments on OGTT and CGM

| N    | Topic                                | Categories and examples                                                                                                                                                                                                                                                                                                                                                                                                                                                         |
|------|--------------------------------------|---------------------------------------------------------------------------------------------------------------------------------------------------------------------------------------------------------------------------------------------------------------------------------------------------------------------------------------------------------------------------------------------------------------------------------------------------------------------------------|
| OGTT |                                      |                                                                                                                                                                                                                                                                                                                                                                                                                                                                                 |
| 6    | Need for an alternative test         | "It is very worthwhile to find alternatives to this much complained about test"<br>"It would be preferable not to have to do a test that is such an inconvenience"                                                                                                                                                                                                                                                                                                              |
| 1    | OGTT over CGM                        | "The test (OGTT), although time consuming and hard for fasting etc is better in my mind as it is done within 2 hours opposed to waiting a week with the sensor"                                                                                                                                                                                                                                                                                                                 |
| 2    | OGTT not representative of lifestyle | "I would rarely sit for such a long period"<br>"I usually don't eat sugar and control level of carbohydrates in my meals"                                                                                                                                                                                                                                                                                                                                                       |
| 2    | Impact of OGTT on health             | "Feels really unhealthy having the glucose drink", "The idea of putting a large amount of sugar into a body that is fasted is just generally off putting in nature to me when are continually told to avoid sugar/ insulin spikes as they are "bad" for us".                                                                                                                                                                                                                    |
| 8    | Side effect of glucose beverage      | "I had sugar high, crash and headache. Was wiped out for most of the day"; "I find the glucose drink very difficult to consume within five minutes, and it makes me feel very nauseated. I experience light-headedness, headache and general unwell feeling afterwards for most of the day" ; "The beverage is horrible and made me sick, especially when you are fasting and experiencing morning sickness"; "The sugar drink caused minor nausea but nothing too concerning". |
| 5    | OGTT time frame                      | "Boring and time consuming", "a big inconvenience" and "quite difficult due to having a toddler". "OGTT is a long process - some people I know have chosen not to complete the OGTT because of the length of time it takes".                                                                                                                                                                                                                                                    |
| 4    | Importance of GDM screening          | "I find it (OGTT) moderately acceptable only due to lack of other options, but acknowledge it is important to identify gestational diabetes early - however it's not an enjoyable process".                                                                                                                                                                                                                                                                                     |
| CGM  |                                      |                                                                                                                                                                                                                                                                                                                                                                                                                                                                                 |
| 15   | Minimal impact                       | "I didn't even notice it"; "CGM was quick, easy and painless to insert, caused no trouble during the week I was wearing it, and was easily removed"; "The CGM gave me no discomfort, allowed me to continue living my life normally.                                                                                                                                                                                                                                            |
| 6    | CGM over OGTT                        | "I would absolutely recommend this type of testing for gestational diabetes to the OGTT test, which take a long time to occur and leaves me feeling unwell due to fasting and excessive sugar intake"; "I would recommend this over the OGTT any day"                                                                                                                                                                                                                           |
| 1    | CMG resistance                       | "Very very impressed at how the device stayed in my arm the entire time - there were even times I forgot it was in and then would be taking off a top, yank it and it would catch the device really hard but it didn't budge - impressed!"                                                                                                                                                                                                                                      |
| 4    | Suggestions                          | -2x shortening CGM period "I would try and get it down to three days of wear. A week is a just a bit of a pain". "A week seems like a long time to wear the device when the current test is only a few hours. I wonder whether an in-between, e.g. 3 days, would give accurate information, too?"<br>-2x self-remove CGM at home: "you should be able to post it back. Coming back for removal is a hassle".                                                                    |
| 10   | Diet tracking problematic            | -6x annoying process: "Keeping a food diary for 7 days was sometimes a bit tedious, and I had to keep reminding myself to input what I had eaten and the times"<br>-2x issues with app: "The app that is recommended was extremely frustrating to use"<br>-2x risk bias: "It was good to also try controlling what I ate, to be healthier than usual"<br>"I was monitoring and writing down all good I had and even loss weight which is beneficial"                            |
| 8    | Technical issues with CGM            | -2x itchiness: "Device became quite itchy towards the end and left a small itchy red welt after removal"<br>-2x bleeding: "After my insertion I bled a bit through my top and didn't realise therefore stained my top. It bled a second time a few days later minimal"<br>-2x wearing: "My only comment was that the devise rubbed of a tight t shirt may have come loose a day before removal".<br>-2x removal "a little uncomfortable pulling hairs out"                      |

CGM= continuous glucose monitoring, GDM=gestational diabetes mellitus, OGTT= oral glucose tolerance test
